# Gene regulatory networks associated with lateral root and nodule development in soybean

Shuchi Smita<sup>1,4</sup>, Jason Kiehne<sup>2</sup>, Sajag Adhikari<sup>1,5</sup>, Erliang Zeng<sup>3,6</sup>, Qin Ma<sup>1,7,\*</sup>, and Senthil Subramanian<sup>1,\*</sup>

<sup>1</sup> Department of Agronomy, Horticulture and Plant Science and Department of Biology and Microbiology, South Dakota State University, Brookings, SD, USA

<sup>2</sup> Simpson College, Indianola, IA.

<sup>3</sup> Department of Biology and Department of Computer Science, University of South Dakota, Vermillion, USA

<sup>4</sup> Present Address: Department of Computational and Systems Biology and Department of Immunology, School of Medicine, University of Pittsburgh, Pittsburgh, PA 15261, USA

<sup>5</sup> Present Address: Celerion Inc., Lincoln, NE 68502.

<sup>6</sup> Present Address: Division of Biostatistics and Computational Biology, College of Dentistry, University of Iowa, Iowa City, USA.

<sup>7</sup> Present Address: Department of Biomedical Informatics, Ohio State University, Columbus, OH 43210, USA.

\* Corresponding Authors Email Id: [Qin.Ma@osumc.edu](mailto:Qin.Ma@osumc.edu) or [Senthil.Subramanian@sdstate.edu](mailto:Senthil.Subramanian@sdstate.edu)

22 **Running Title: Soybean root lateral organ gene regulatory networks**

23

24 **Abstract**

25 Legume plants such as soybean produce two major types of root lateral organs, lateral roots and  
26 root nodules. A robust computational framework was developed to predict potential gene  
27 regulatory networks (GRNs) associated with root lateral organ development in soybean. A  
28 genome-scale expression dataset was obtained from soybean root nodules and lateral roots and  
29 subjected to biclustering using QUBIC. Biclusters (BCs) and transcription factor (TF) genes with  
30 enriched expression in lateral root tissues were converged using different network inference  
31 algorithms to predict high confident regulatory modules that are repeatedly retrieved in different  
32 methods. The ranked combination of results from all different network inference algorithms into  
33 one ensemble solution identified 21 GRN modules of 182 co-regulated genes networks  
34 potentially involved in root lateral organ development stages in soybean. The pipeline correctly  
35 predicted previously known nodule- and LR-associated TFs including the expected hierarchical  
36 relationships. The results revealed high scorer AP2, GRF5, and C3H co-regulated GRN modules  
37 during early nodule development; and GRAS, LBD41, and ARR18 co-regulated GRN modules  
38 late during nodule maturation. Knowledge from this work supported by experimental validation  
39 in the future is expected to help determine key gene targets for biotechnological strategies to  
40 optimize nodule formation and enhance nitrogen fixation.

41

## 42 **Introduction**

43

44           Gene regulation is a fundamental process that controls spatial and temporal patterns of  
45 gene expression. Transcription factors (TFs) are central to gene regulation as their activities  
46 determine the expression patterns and function of multiple genes (1). A TF is a functional protein  
47 that binds to short sequences (called TF binding site; TFBS or *cis*-regulatory elements) on the  
48 upstream promoter region of genes to regulate their transcription. One TF can regulate multiple  
49 genes including other TFs in a signaling, developmental, or metabolic pathway and so act as  
50 master regulators of the pathways. The nested group of all different TF regulators and their  
51 downstream target genes form gene regulatory networks (GRNs) (2). Identification of gene  
52 regulatory networks and key TFs that are part of these networks is an effective approach to  
53 answer multiple biological questions on genotype to phenotype relationships. For example,  
54 potential TFs, their co-regulators, and downstream signaling pathways, and target genes  
55 associated with specific biological processes can be predicted by constructing GRNs.

56

57           Clustering of large-scale datasets such as global gene expression profiles obtained by  
58 RNA-sequencing to identify co-regulated TFs and the targeting genes is a promising approach to  
59 model and infer the GRNs at a systems level (3, 4). Briefly, genes/TFs with similar expression  
60 patterns (i.e. co-expressed genes) with a tendency to co-activate across a group of samples might  
61 give insight on TFs regulated gene network and related biological process. In fact, multiple  
62 levels of gene regulation affect transcriptional regulatory capabilities (5). Recruitment and  
63 binding of other protein such as “co-factors” in complexes and other small protein molecules to  
64 target DNA sequences is one of the major mechanisms (6). Often, this interactions between  
65 different TFs and co-factor partners are studied using protein-protein interaction (PPI) assays  
66 which provide immediate insights into their potential biological function (7, 8). GRNs can be  
67 validated by PPI data, as PPIs can reveal signaling, regulatory and/or biochemical roles of  
68 proteins based on their interactomes (9).

69           The combined use of high-throughput data and mathematical models to build gene co-  
70 expression and regulatory networks is the core principle of systems biology approaches (10).  
71 However, these large-scale datasets are likely to be noisy, and GRN predictions using these big  
72 datasets may contain many false positives. Additionally, GRN inference is a computationally

73 intensive job; so filtered datasets consisting of well-defined/accurate datasets (such as  
74 significantly co-expressed genes set) might dramatically reduce the computational complexity  
75 and time. Most importantly, it would reduce the true search space for the prediction of regulators  
76 (TFs) and their potential target genes. In order to obtain significantly co-expressed genes,  
77 “biclustering” is a desirable method as it allows two-way clustering of genes as well as samples  
78 i.e. a similar expression pattern (co-expressed genes) under a subset of all samples.  
79 Subsequently, this sorted biclustering-filtered data fed into GRN inference algorithms might  
80 improve and accurate predictions of a regulator and their target genes. We applied this approach  
81 to determine gene regulatory networks associated with root lateral organ development in  
82 soybean.

83  
84 Plants produce lateral organs such as leaves, flowers, and axillary branches in the shoot,  
85 and lateral roots in the roots. Pools of stem cells present in the growing tip of the shoot (the shoot  
86 apical meristem) contribute to the formation of aerial/shoot lateral organs. Lateral organs in the  
87 root are unique in that they are derived via “*de novo*” differentiation of mature cells in the root.  
88 Lateral roots are present in all vascular plants, but a group of *Fabids* clade plants is capable of  
89 producing another root lateral organ, called root nodules. These arise from specific and  
90 coordinated interactions with a set of nitrogen-fixing bacteria collectively called rhizobia. For  
91 example, the interaction of soybeans with *Bradyrhizobium diazoefficiens* results in root nodules.  
92 Biological nitrogen fixation in root nodules helps reduce the need for chemical nitrogen  
93 fertilizers, which are expensive and cause environmental pollution. Similarly, proper patterns of  
94 lateral root formation (root branching) are crucial for plants to access water and other nutrients in  
95 the soil. Therefore, these two root lateral organs play important roles in the development of  
96 soybeans, a major crop in the United States as well as in other countries. Many functional  
97 genomics studies have identified genes expressed during nodule development in soybean and  
98 other legumes, but gene expression profiles during lateral root formation have not been evaluated  
99 in legumes (11, 12).

100 Recently, we obtained transcriptomes of emerging nodules, mature nodules, emerging  
101 lateral roots, and young lateral roots in soybean (13), we present a robust computational  
102 framework, which we applied to predict TFs and their target GRNs associated with soybean root  
103 nodule development. This approach consists of the following steps (Figure 1): (i) preparing a

104 compendium of soybean lateral organ transcriptome data and cataloging TFs enriched in root  
105 nodules; (ii) Initial biclustering of transcriptome data using QUBIC (14, 15, 16) to identify all  
106 (nodule development stage-specific) co-expressed gene modules; (iii) GRN construction and  
107 inference based on identified gene modules and reliable network construction programs, Lemon-  
108 Tree (17) and Inferelator (18); (iv) Augmentation of GRNs with evidence from physical or direct  
109 and indirect regulatory interaction information from PPI and *cis*-regulatory element enrichment  
110 analysis; and (v) building a consensus from different modes of GRN inference for potential  
111 regulators and their predicted GRNs. We ran two modes of Lemon-Tree, one with default mode,  
112 where Lemon-Tree itself produce the co-expressed clusters and the other mode with reinforced  
113 bicluster (BC) information from QUBIC. This study provides a template framework for GRN  
114 construction and augmentation by exploiting big data sets, which are increasingly generated,  
115 deposited and available (making use of available data) in public domain.

116

## 117 **Material and methods**

118

### 119 **RNA-seq dataset for root lateral organ development in soybean**

120 We utilized the genome-wide soybean transcriptome dataset generated for root lateral  
121 organs (13). This dataset contains the transcriptomes of two different developmental stages of  
122 two root lateral organs collected in three biological replicates: emerging nodules (EN), mature  
123 nodules (MN), emerging lateral roots (ELR) and young lateral roots (YLR). Adjacent root  
124 sections above and below these organs devoid of any lateral organs (designated as ABEN,  
125 ABMN, ABELR, and ABYLR respectively) were used to construct respective age- and  
126 inoculation-status appropriate control tissue libraries. Comparison of gene expression profiles  
127 between each lateral organ tissue type and the corresponding control tissue type (e.g., EN vs.  
128 ABEN, ELR vs. ABELR and so on) helped identify organ-specific/enriched genes. In total, 24  
129 RNA-seq libraries (four target tissue types, four control tissue-types, three biological replicates  
130 each) were prepared, sequenced, and analyzed. Expression patterns of preciously known marker  
131 genes, consistency between replicates, high sequence quality of this dataset indicated that it was  
132 of very high quality and well-suited for global gene expression analysis (13). A total of 113,210  
133 gene transcripts (FPKM threshold  $\geq 1$  in at least one sample) with their normalized expression  
134 values in 24 different tissues from the above dataset were utilized here.

135

136 Further, for expression comparisons at different steps during our analysis, we utilized the  
137 public datasets, soybean gene atlas encompassing RNA-seq data from 14 different soybean  
138 tissues (19) and Soybean eFP browser <http://bar.utoronto.ca/efpsoybean/cgi-bin/efpWeb.cgi>  
139 comprising RNA-seq data from soybean root hair and other tissues (20, 21). Soybean genome  
140 sequence assembly version 7.0 (Gmax\_109\_gene.gff3.gz"; [ftp://ftp.jgi-  
141 psf.org/pub/compngen/phytozome/v9.0/Gmax/annotation/](ftp://ftp.jgi-psf.org/pub/compngen/phytozome/v9.0/Gmax/annotation/)) was used for gene annotation and  
142 Arabidopsis orthologs information.

143

### 144 **Cataloging TFs enriched in root lateral organ development stages in soybean**

145 To achieve our objective of identifying regulator TFs and prediction of GRNs associated  
146 with root nodules, we used soybean transcription factor annotations from the Plant transcription  
147 factor database (PlantTFDB v3.0; <http://planttfdb.cbi.pku.edu.cn/>) (22) as a starting point.  
148 Among 58 TF families annotated in soybean, 48 TF families had at least one member  
149 differentially expressed in at least one of the four organ tissue types. For each TF family, we  
150 summed the unique transcripts that were enriched in EN and/or MN to calculate the total number  
151 of family members enriched in nodule tissues. Similarly, we calculated the number of TFs  
152 enriched in lateral root tissues. By comparing the number of family members enriched in nodule  
153 vs. lateral root tissues, we identified nodule-specific or -enriched, lateral root-specific or -  
154 enriched, and lateral organ non-specific (equal number of transcripts in lateral root and nodules)  
155 TF families (Figure 1; Table S1). Statistical analysis (Fisher's Exact test,  $P < 0.05$ ) of nodule- vs.  
156 lateral root- specific enrichment showed that TALE, MYB-related, MIKC, C2H2, bZIP, G2-like,  
157 WRKY, and NFYB were either nodule-specific or significantly enriched in nodules (Figure 2).  
158 Overall, very distinct families of TFs appear to be active in nodule and lateral roots despite  
159 reported morphological similarities between these organs.

160

161 We selected a set of 294 TFs, which were differentially expressed and specifically  
162 enriched in EN, and MN tissues in our dataset as possible regulators (see Results, Supplementary  
163 Table S1). This approach led us to focus on regulators and their GRNs acting specifically during  
164 nodule development. We also included 22 previously characterized TFs/ regulator genes reported  
165 elsewhere in literature for their respective role in root lateral organ development in model crop  
166 plants as positive control marker genes for validation and relevancy of parameters

167 (Supplementary Table S2). For example, ENOD40, FWL1, LBC\_A, LBC\_C1, LBC\_C2, and  
168 LBC\_C3 genes were used as marker genes, and NIN1 and NSP1 were used as marker regulators  
169 for nodule development. ARF5, CRF2, GATA23, LRP1, and TMO7 genes were used as marker  
170 regulators for lateral root development. Together, we used 316 TFs of interest as a starting point  
171 for the identification of GRNs.

172

### 173 **Initial biclustering of transcriptome data**

174 We utilized normalized expression values of all the 113,210 gene transcripts in 24  
175 libraries for initial biclustering, rather than only significantly differentially expressed gene  
176 (DEGs) transcripts. We reasoned that irrespective of enrichment, the TFs and their target gene  
177 clusters tend to have similar expression patterns in the root lateral organs, making this an  
178 unbiased approach. We chose biclustering (two-way clustering), over traditional clustering for  
179 simultaneously clustering using QUBIC (QUalitative Biclustering) (15) to identify all the  
180 statistically significant biclusters (BCs) of target genes with TFs, if any as well as samples from  
181 the above transcriptome data. Different combinations of QUBIC's parameters were tuned to  
182 optimize biclustering to retain the majority of TFs while keeping the total number of transcripts  
183 to the minimum. The program first discretizes the data using the parameters  $q$  and  $r$  and then a  
184 heuristic algorithm applied to identify biclusters, where  $q$  is the proportion of affected expression  
185 data under all conditions for each gene; and  $r$  represents the rank of the regulating conditions  
186 detected by the parameter  $q$ . It is suggested to select a smaller  $q$  to focus on a local regulator  
187 (15). Parameter  $f$  controls the overlap between different BCs, and  $k$  controls the minimum  
188 number of samples in BCs. Another important parameter  $c$ ; which controls the level of  
189 consistency in BCs, was tested to balance the number of TFs and a total number of genes  
190 covered in BCs. We obtained 219 BCs that contained 240 of the 316 TFs (76%) and 30, 639 out  
191 of 113,210 transcripts (~27%; See Results for details). This “filtered” dataset was used for  
192 regulator and GRN prediction. All programs were tested and implemented on a Linux server  
193 with Intel x86-64 processor and 32 cores with 1TB RAM configuration.

194

### 195 **Prediction of potential TF regulators and their GRN inference**

196 To improve the confidence of regulator and GRN prediction, we utilized two module-  
197 based GRN inference methods: Lemon-Tree (v.3.0) (17) and Inferelator (v.2015.08.05) (23). We

198 compared and scored the regulatory prediction made by both methods to select high confidence  
199 regulators and their target genes in GRN.

200

## 201 **Lemon-Tree**

202 Lemon-Tree has the option to integrate cluster information; hence, we ran it in two  
203 modes: (i) where clusters were generated by Lemon-Tree from the “filtered” dataset (mode I)  
204 and (ii) where BC information from QUBIC was fed to Lemon-Tree as co-expressed gene  
205 modules for GRN inference (mode II). For mode I, we ran ten independent Gibbs sampler runs  
206 of Lemon-Tree (with default parameters) to identify the most confident regulatory modules and  
207 TF regulators. The results were used to extract representative module solution (tight clusters)  
208 from an ensemble of all possible statistical models using the Gibbs sampler method. Lemon-Tree  
209 modules are clustered (hierarchical tree) based on samples with similar mean and standard  
210 deviation. This tight cluster corresponds to sets of genes, frequently associated across all  
211 clustering solutions. For mode II, we prepared this tight cluster dataset using BCs information  
212 from QUBIC, but otherwise used the same settings used for mode I.

213

214 In the next step, the Lemon-Tree algorithm provides a list of weighted TFs with a ranked  
215 probability score, and the top 1% were selected as true regulators for each cluster of co-  
216 expressed genes. A global score reflecting the statistical confidence of the regulator assigned to  
217 each node in a hierarchal tree manner for each set of co-expressed genes modules. The regulator  
218 score takes into account the number of trees a regulator is assigned to, with what score (posterior  
219 probability), and at which level of the tree (24). An empirical distribution of scores for randomly  
220 assigned regulators-to-module is also provided to assess significance (17). In this dataset, the  
221 lowest score of a regulator in the top 1% list was at least 3x higher than that of the highest score  
222 for a randomly assigned regulator (See Result section for details). Therefore, either the top 1% or  
223 at least a 3-fold higher score than randomly assigned regulators appears to be a good threshold to  
224 determine true regulators.

225

## 226 **Inferelator**

227 Inferelator (20 bootstraps) with default settings was utilized to build regulatory networks.  
228 Similar to Lemon-Tree, it also uses the gene expression matrix to predict the regulator TFs and



229 their target genes. However, unlike Lemon-Tree, Inferelator does not take cluster information as  
230 input, but generates its own clusters. The program generated a ranked list of target genes for each  
231 regulator TF utilizing the gene expression matrix and the TFs of our interest. Unlike Lemon-  
232 Tree, there is no "score-based" selection of TFs in Inferelator, while there are score-based  
233 regulatory interactions between TF and their target genes. Inferelator-generated scores ( $s$ ) for TF  
234 ( $x$ ) regulating gene ( $g$ ) using input gene expression matrix (*RNA-seq*) as:

$$s(x \rightarrow g|RNAseq) = Inferelator(x \rightarrow g|RNAseq) \times sign(cor(x, g))$$

235 where a regulatory interaction confidence score is multiplied by the sign of the correlation  
236 coefficient between the TF and the putative target gene to differentiate putative activating from  
237 repressing interactions (positive and negative scores, respectively) (18, 25).

238

### 239 **Combined scoring of regulatory predictions for consensus GRN**

240 By taking advantage of the top regulator prediction feature of Lemon-Tree and top-  
241 ranked regulatory target prediction of Inferelator, we compared and combined TF and targeted  
242 module genes from all three-inference solutions: Lemon-Tree mode I, II, and Inferelator  
243 (described above). The regulatory TFs and corresponding target genes common among all three-  
244 inference solutions using Linux "comm" command, were rated as potential consensus regulators  
245 and their targeted GRN interactions. Ranked score function for every predicted regulatory  
246 interaction was calculated by normalizing scores produced by each inference solution (score  
247 divided by the highest score in each inference solution) and then averaging normalized score  
248 calculated from all three-inference solutions. These ranked scores were used to select high  
249 confidence candidate TF-target interactions. These were showed in edges in the GRN modules,  
250 visualized and analyzed using Cytoscape (version 3.3.0) (26).

$$Average\ score, A_s = \frac{\sum Ns(L - mode\ I), Ns(L - mode\ II), Ns(Inferelator)}{3}$$

$$where, Ns = \frac{x}{X}$$

251 Ns=normalized score

252 x = probabilistic score from each mode

253 X= maximum score in each mode

254 L-mode I = Lemon-Tree mode I

255 L-mode II = Lemon-Tree mode II

256

## 257 **Protein-protein interaction (PPI) network evidence for physical interaction**

258 Most eukaryotic TFs recruit various co-factors for their DNA-binding specificities and  
259 regulatory activities through PPIs. To evaluate potential PPIs that are part of the predicted GRNs,  
260 a total of 31,932,066 predicted/experimentally validated soybean protein interactions (NCBI  
261 taxon-Id:3847) were obtained from the STRING database (version 10.0) (search tool for the PPI  
262 network) (27). This database provides information on both experimental and predicted  
263 interactions from varied sources based on co-expression, experiments and literature mining, etc.  
264 We evaluated and compared if the predicted TFs and targets from the different inference  
265 solutions (Lemon-Tree mode I, II and Inferelator) were potential PPI partners using all the  
266 31,932,066 STRING PPI interactions in soybean. Non-redundant dataset, ignoring the transcript  
267 numbers of TFs, targets (from TF-target interactions) predicted by three individual inference  
268 solutions and PPI from STRING were compared using the Linux “*comm*” command to identify  
269 TF-target pair common in STRING dataset and their PPI scores.

270

## 271 **Cis-regulatory motif and functional enrichment analysis evidence for direct regulation**

272 *Cis-regulatory* motif enrichment was carried out using potential promoter sequences of  
273 target genes for all potential regulator TFs predicted by all three inference solutions (Lemon-  
274 Tree mode I, II and Inferelator). Motif enrichment and Gene Ontology were performed by  
275 ShinyGO (<http://www.ge-lab.org:3838/go/>) using p-value cutoff (FDR) < 0.05 to determine  
276 regulation and function.

277

## 278 **Results**

279

### 280 **Optimization of QUBIC parameters for initial biclustering**

281 The primary goal for biclustering in our analysis was to optimize the total number of  
282 significant BCs; where the majority of the TFs (out of TFs of interest and marker TFs) are  
283 retained while keeping the total number of genes to a minimum for true GRN prediction. In order  
284 to evaluate this condition, we iterated various runs in several steps to empirically optimize key  
285 QUBIC parameters. For example - *q* to focus on a local regulator, and as regulatory networks are

286 quite small networks, we chose smaller  $q$  values. To control the overlap by checking the  
287 overlapping genes and the number of TFs in between produced BCs, we iterated the run with  $f =$   
288 0.5 to 0.65 (by 0.1). We used  $k = 6$  presumably to retain at least three replicates each from either  
289 early or late developmental stages or from lateral root or nodule tissue types in one BC.  
290 Importantly, the consistency level of BCs was tested using parameter “ $c$ ” iterated from  $c = 0.5$  to  
291 1 (by 0.1) to balance the number of TFs and a total number of genes covered in BCs. We noticed  
292 that the lower consistency level “ $c$ ” values led to the increased size of BCs. We evaluated the  
293 produced BCs to determine the “ $c$ ” value at which we covered the greatest number of TFs in  
294 comparison to a total number of genes without losing much consistency ( $c$ ). At  $c = 0.98$ , 76% of  
295 the TFs of interest were retained with just 27% of the genes covered in BCs (Figure 3).  
296 Interestingly, the maximum number of marker TFs (18 out of 22) cataloged for root lateral  
297 organs were covered at  $c = 0.98$ . On the other hand, at the best consistency level ( $c=1$ ), only  
298 three marker TFs were covered in BCs (not shown). Overall, based on results from several  
299 iterations and optimizing for the inclusion of greater number of TFs in BCs, we finalized the  
300 following parameters:  $r = 1$ ,  $q = 0.2$ ,  $c = 0.98$ ,  $o = 500$ ,  $f = 0.25$ ,  $k = 6$ ; which produced 219  
301 statistically significant BCs (Supplementary Table S3). These 219 BCs comprised ~27% (30,  
302 639 out of 113,210) of total gene transcripts. Notably, ~76% (240 out of 316 TFs of our interest)  
303 of the TFs of interest and marker TFs were retained in 141 of the 219 total BCs produced. The  
304 first cluster was the largest cluster with a total of 446 genes. We conclude that the empirical  
305 determination of biclustering parameters depending on the biological question and the associated  
306 experimental objective is crucial for useful outcomes.

307

### 308 **Evaluation of QUBIC biclusters using characterized TFs and co-expressed genes from** 309 **public lateral root organ-related datasets**

310 We observed organ-specific bicluster each for lateral root (both ELR and LR; BC001)  
311 and nodule (both EN and MN; BC013) tissues that included all three biological replicate samples  
312 in one bicluster, suggesting that these are likely to be highly consistent and reproducible. Four  
313 BCs each were specific to all three replicates of ELR (BC015, 019, 033 and 101) and MN (044,  
314 048, 152 and 155) tissue types (Supplementary Table S3). To test the rationality of BCs, we  
315 compared the expression patterns of co-expressed genes with marker TFs in publicly available  
316 transcriptome data (19). The transcription factor “*NSP1 (Glyma16g01020)*” crucial for nodule

317 development was present in BC037 and BC045 (Supplementary Table S3B). BC037 was specific  
318 to nodule tissues and comprised of 367 co-expressed genes. Among these, 52% had more than  
319 two-fold up-regulation in EN and MN tissues in our RNA-seq data. A marker gene highly  
320 enriched in nodule tissues, *ENOD40* (*Glyma02g04180*), was found in five BCs (BC013, 22, 40,  
321 45, 53 and 95) with different combinations of nodule samples clustered together in each BC. All  
322 genes in BC013 that showed specificity for nodule tissue samples with all three replicates in EN  
323 and MN in our study. Also, 50% of the genes from this BC showed greater expression in nodule  
324 tissue relative to other tissues types in the soybean gene expression atlas (19) (Supplementary  
325 Table S4). Gene Ontology (GO) enrichment analysis for this BC showed enrichment of nucleic  
326 acid metabolic process GO term with a significant p-value (FDR; 0.02) and molecular function  
327 GO term “Purine ribonucleoside triphosphate binding (FDR; 0.05); both of which are associated  
328 with biological nitrogen fixation, a process specific to nodule tissues. For example, soybean  
329 nodules export nitrogen in the form of ureides (purines) (28). The above observations indicate  
330 the appropriate clustering of relevant transcripts and validate the parameters used for clustering.  
331 Notably, we observed few novel transcripts and genes with unknown function, co-expressed in  
332 the nodule-specific biclusters (Supplementary Table S4). This observation suggests a potential  
333 role for these genes in nodule development and offers candidate genes for functional  
334 characterization.

335  
336 Further, we took advantage of the time course data for IAA-induced lateral root  
337 development in *Arabidopsis* (29), to select and evaluate marker genes present in LR-related BCs  
338 in soybean. For example, the LR marker TF, *GmTMO7* (*Glyma04g34080*), a potential ortholog  
339 of *Arabidopsis TMO7* identified in the above study, was present in BCs 110, 120 and 173  
340 (Supplementary Table S3). Of the 113 genes present in BC120, 96 showed coordinated up-  
341 regulation with *TMO7* in LR tissues, whereas 17 showed negative co-expression. Upon  
342 comparison with the *Arabidopsis* LR induction time course dataset (29), we found 15 co-  
343 expressed soybean orthologs (13 positively co-expressed and 2 negatively co-expressed). Where  
344 seven (out of 13) from positively co-expressed gene orthologs set were mostly induced in the  
345 later stage of lateral root development, one (out of two) from negatively co-expressed had down-  
346 regulation in a later stage of lateral root development (see marked blue and red box in  
347 Supplementary Table S5). The other lateral root marker *LRP1* was in BC019 that comprised of

348 845 genes. Among these genes, 746 were positively and 99 were negatively co-expressed with  
349 LRP1 in all three replicates of ELR. Interestingly, 30 (out of 46 matched genes) of the positively  
350 co-expressed genes were potential orthologs of Arabidopsis genes that also showed induction  
351 during a similar stage of lateral root development (Supplementary Table S5) in the LR induction  
352 time course dataset (29). These comparisons enabled us to evaluate the ability of biclustering  
353 parameters and GRN algorithms to appropriately identify regulators and regulatory relationships  
354 of target genes during root lateral organ development.

355

### 356 **Regulatory TF and their Gene Regulatory Networks (GRN) related to root lateral organ** 357 **development in soybean**

358 For the prediction of regulators and inference of corresponding GRNs, we utilized only  
359 those 141 BCs that contained our TFs of interest and marker TFs (240 TFs) which comprised  
360 25.8% (29,270 out of 113,210) of expressed gene transcripts. This approach potentially reduced  
361 the computational complexity and time required for modeling GRNs relevant to our study. This  
362 sum expression matrix of 29,270 genes and 240 TF genes (Supplementary Table S6) was used as  
363 input for GRN inference by Lemon-Tree mode I, mode II and Inferelator.

364

365 Lemon-Tree produced 828 tight clusters in step 1 from the input expression matrix. A  
366 higher number of clusters (828 vs. 141 BCs from QUBIC) suggested that Lemon-Tree clusters  
367 were relatively more discrete/smaller in comparison to QUBIC BCs. In step 2, two separate  
368 options/modes were utilized (See methods and Figure 1). In mode I, we utilized the 828 tight-  
369 clustered modules generated by Lemon-Tree (mode I) and in mode II, the 141 BCs produced by  
370 QUBIC (mode II). In mode I, 176 TFs were ranked as the top 1% regulators, whereas in mode II,  
371 92 TFs were ranked as top 1% regulators (Supplementary Table S7). Score evaluation was  
372 performed for top 1% and randomly predicted regulators from both modes. In both the cases, the  
373 minimum score for a top regulator (14.22; mode I and 12.13 mode II) was ~3 times higher than  
374 the maximal score (4.99; mode I and 4.23; mode II) for a randomly assigned regulator (Figure 4).  
375 This suggested that the scores for top regulators are greater than what could be expected by  
376 chance. Inferelator algorithm predicted 132 TFs as potential regulators and five predicted groups  
377 (Supplementary Table S7). Comparison of 176, 92, and 132 TFs predicted as regulators  
378 respectively, by Lemon-Tree mode I, mode II, and Inferelator, revealed that 56 TFs (~27%) were

379 predicted by all three different modes (Figure 5A). We ranked these common 56 TFs as high  
380 confidence TF regulators. In addition, ~62% of the TFs predicted as regulator by Lemon-Tree  
381 mode I were also identified as regulators by Lemon-tree mode II and/or Inferelator  
382 (Supplementary Figure S1A).

383

384 Furthermore, a total of 113,668 non-redundant TF-target regulatory interactions were  
385 predicted by all three modes (Lemon-Tree mode I – 26,012, mode II – 95,845 and Inferelator -  
386 3,287) (Supplementary Table S8). A higher number of regulatory interactions in Lemon-Tree  
387 mode II is likely due to larger BCs produced by QUBIC. There was relatively smaller overlap  
388 among the three modes (Supplementary Figure S1B). We evaluated if the known LR and nodule  
389 marker TFs were predicted as regulators as a measure of successful TF prediction by the three  
390 different modes. Soybean orthologs of lateral root marker TFs, LRP1 (Glyma14g03900), ARF5  
391 (Glyma14g40540), CRF2 (Glyma08g02460), and *TMO7* (Glyma04g34080 and  
392 Glyma06g20400) were predicted as regulators by all three inference modes. Additional orthologs  
393 of ARF5 (Glyma17g37580) and CRF2 (Glyma05g37120) were predicted as regulators by  
394 Lemon-Tree mode I and II. However, orthologs of GATA23 (Glyma03g39220,  
395 Glyma19g41780), and LRP1 (Glyma02g44860, Glyma07g35780) were not identified as  
396 regulators by any of the modes. These four genes were not enriched in LR tissues  
397 (Supplementary Table S2) potentially why they were not predicted as a regulator in this dataset.  
398 Successful prediction of four of the five LR-associated markers correctly as regulators by all  
399 three modes suggested that the pipeline was reliable and would be used in predicting previously  
400 unknown regulators of nodule development.

401

402 A number of TFs were demonstrated to play a crucial role in nodule development through  
403 genetic evidence from model legumes (4, 30). These include *NODULE INCEPTION* (*NIN*)  
404 (RWP-RK family; (31), *NODULATION SIGNALING PATHWAY1* and 2 (*NSP1* and *NSP2*;  
405 GRAS domain proteins), Nuclear Factor Y (*NF-YA1*; (32)), Ethylene Response Factors  
406 Required for Nodulation (*ERN1* and *ERN2*; AP2/ERF family; (33)), and *CYCLOPS* (coiled-coil  
407 domain protein) (34–37). In addition, a MYB TF that interacts with *NSP2*, an ARID domain  
408 protein that interacts with *SymRK*, a bHLH and a set of HD-ZIP IIIs involved in nodule vascular  
409 development, and a C2H2 Zn finger TF involved in bacteroid development are also known (38).

410 A potential soybean ortholog of NIN, Glyma02g48080 (34), belonging to orthogroup OGEF1237  
411 was predicted as a regulator by Lemon-Tree mode I. Only one other NIN-like gene in this  
412 orthogroup (Glyma04g00210) was included in our list of input TFs based on expression  
413 enrichment in nodules, but was not predicted as a regulator by any mode. Two other NIN-like  
414 genes outside of this orthogroup (Glyma12g05390 and Glyma01g36360) were predicted to be  
415 regulators by Lemon-Tree modes I and II. Nodule-enriched NFY-As (Glyma02g35190 and  
416 Glyma10g10240) were identified as regulators by Lemon-Tree mode I and Inferelator. In *Lotus*  
417 *japonicus*, two Nuclear Factor-Y (NF-Y) subunit genes, *LjNF-YA1* and *LjNF-YB1*, were  
418 identified as transcriptional targets of NIN (39). In agreement, our analysis predicted that one of  
419 the soybean NIN-like genes, Glyma12g05390, regulates NF-YA1 (Glyma10g10240; Lemon-  
420 Tree mode II) and the other NIN-like gene, Glyma01g36360, regulates NF-YA2  
421 (Glyma02g35190; Lemon-Tree mode I; Supplementary Table S7).

422 Two potential orthologs of LjERN1 (Glyma02g08020 and Glyma19g29000) were  
423 predicted as regulators by Lemon-Tree modes I and II. Among the major nodulation TFs, only  
424 NSP1 was not predicted to be a regulator by our GRN pipeline. In summary, the pipeline  
425 correctly predicted known nodulation and LR TFs including the expected relationships between  
426 NIN, NF-YA, and ERN1.

427

#### 428 **Putative protein-protein interactions (PPI) identified in root lateral organ-related GRNs**

429 Co-expressed and co-regulated genes have a higher likelihood of having an indirect  
430 functional interaction or direct physical interaction (40). Many TFs form a complex with other  
431 proteins for proper molecular and cellular activity. PPIs are the physical interactions between  
432 two or more proteins which form the crux of a functional protein complex formation (41). To  
433 evaluate if potential regulators identified by us undergo PPIs with other co-regulated proteins, we  
434 compared all 113,668 unique TF-target predicted regulatory interactions from three modes of  
435 GRN inference method against experimentally verified and/or predicted PPIs based on  
436 experimental data reported in the STRING database (see methods for details). We identified, 843  
437 potential interactions among 69 TFs with PPI confidence scores ranging from 150 to 995  
438 (Supplementary Figure S2, Supplementary Table S9). The high scorer (>800) PPIs were  
439 observed from Lemon-Tree mode II run. It was previously suggested that a score < 800 were  
440 probably false positives that originated from prediction methods (42). Also, the maximum

441 number (~64%) of PPI interactions were identified by Lemon-Tree mode II, while only four PPI  
442 were predicted by all three modes (Supplementary Figure S1C). A likely explanation is the  
443 comparatively bigger BCs in this mode generated by QUBIC. While overall, in comparison to all  
444 predicted interactions by each mode independently, Inferelator had a greater frequency (2%) of  
445 interactions in PPI, i.e., out of total predicted 3288, 61 were observed in PPI, followed by  
446 Lemon-Tree Mode I (1%) and then mode II (0.65%). Two ARF5 lateral root markers  
447 Glyma14g40540 and Glyma17g37580 were predicted to interact with Glyma13g43050 (PPI  
448 score 980) and Glyma15g13640 (PPI score 530) present in GRNs predicted by Lemon-Tree  
449 mode I and Inferelator respectively. Glyma13g43050 is an ortholog of Arabidopsis IAA28 which  
450 has been demonstrated to interact with AtARF5 (43), and this regulatory module plays a key role  
451 in lateral root development (44).

452

#### 453 **High confidence TF regulators and their GRNs associated with root lateral organ** 454 **development in soybean**

455 To determine high-confident regulatory interactions and build a consensus GRN, we  
456 evaluated if interactions were conserved across all three modes of GRN prediction (Lemon-Tree  
457 modes I, II and Inferelator). Results showed that 182 co-regulatory interactions (for 21 TFs) were  
458 commonly predicted by all three modes (Figure 4B, Supplementary Table S10). Therefore, for  
459 38% of the TFs predicted as a regulator (21 of 56), have also predicted common target genes  
460 independently by all three modes. These 21 TFs made independent GRN with their co-regulated  
461 target genes (Figure 6). We ranked the consensus interactions by computing the average of the  
462 normalized score given by all three GRN inference modes (ranged from min = 0.19, max=0.88)  
463 (See materials and methods for full detail). Table 1 shows the score for 21 commons TFs and  
464 their common regulatory interaction predicted from different methods (Lemon-Tree mode I,  
465 Lemon-Tree mode II and Inferelator). The complete list of modules together with their high-  
466 scorer regulators for this study is available in the Supplementary Table S10. Based on the  
467 expression of the TF regulator and their predicted target (Figure 7), we categorized GRN  
468 enriched in specific lateral organ tissues.

469

470 TF regulators AP2; ANT (AINTEGUMENTA), transcriptional factor B3 family protein,  
471 AtGRF5 (Growth-Regulating Factor 5), C3H, AtbZIP52 (*Arabidopsis thaliana* basic leucine



472 zipper 52), PC-MYB1, and SHR (Short Root) appear to co-regulate GRN modules during early  
473 nodule (EN) development. TF regulators GRAS; scarecrow-like transcription factor 6 (SCL6),  
474 LBD41 (LOB Domain-Containing Protein 41), AP2 domain-containing transcription factor  
475 TINY, NUC (nutcracker); nucleic acid binding, AtbZIP5 (Arabidopsis thaliana basic leucine-  
476 zipper 5), FRU (FER-Like Regulator Of Iron Uptake), ARR18 (Arabidopsis Response Regulator  
477 18) and two unknown TF proteins appear to co-regulate GRN modules late during nodule (MN)  
478 development. Interestingly, four PPI interaction (out of total 843 PPI network) were also  
479 commonly predicted by all three GRN inference networks in our study for LBD41 and FRU in  
480 mature nodules (Supplementary Table S10, Supplementary Figure S2B). ARF16 and AUX/IAA-  
481 ARF complex were observed for ELR development, whereas TMO7 and ARF10 (Auxin  
482 Response Factor 10) co-regulated GRN for YLR development in soybean.

483

## 484 **Discussion**

485

486 In spite of the economic and environmental importance of biological nitrogen fixation in  
487 nodule in soybean, there is still an unanswered question of what key TFs regulate the underlying  
488 GRNs in nodules and lateral roots (4). We developed a robust computational framework for  
489 GRN construction using genome-scale gene expression data. Specifically, this framework  
490 integrates genomic and transcriptomic data to infer the key regulators and GRN associated with  
491 nodule development in soybean. The predicted networks consistently included experimentally  
492 verified genes, demonstrating the ability of our framework to reveal significant, potentially  
493 important GRNs. With a broader impact, the framework can be used as a template for  
494 constructing GRNs to address any biological question of interest in any species.

495

496 To reduce the computational complexity and make the predicted regulator TFs and GRNs  
497 relevant to our biological question, a biclustering method and a regulatory network inference tool  
498 were used, where their parameters were optimized via several iterations for data analysis and  
499 modeling. Among existing GRN inference algorithms, Lemon-Tree and Inferelator were  
500 successfully applied in different biological questions due to their valued feature i.e. top regulator  
501 and top-ranked regulatory target prediction (45–48). Lemon-Tree detects regulatory modules and  
502 regulators from gene expression data using probabilistic graphical models (17). Whereas,

503 Inferelator learns a system of ordinary differential equations using the Bayesian Best Subset  
504 Regression that describes the rate of change in transcription of each gene or gene-cluster, as a  
505 function of TFs. It has been shown that predictions made by the Inferelator are highly accurate  
506 for top ranking predictions. Stochastic Lemon-Tree and Inferelator perform better if the  
507 transcriptional program can be inferred from a pre-specified list of regulators rather than from a  
508 full gene list, because erroneous interactions with non-regulators will be eliminated a priori (49).  
509 So, we took the differentially expressed TFs and predefined marker TFs with a known role in  
510 nodule and LRs to infer GRN.

511

### 512 **Novel regulators of nodule development**

513 We distinguished organ (lateral root/ nodule) and/or developmental stage-specific  
514 (early/mature) consensus GRNs based on organ-specific enrichment of the TFs, their differential  
515 expression and expression pattern of their co-regulated genes in our transcriptome data. In  
516 addition, we also employed comparative genomics and information from public tissue atlas and  
517 transcriptome data. The analysis correctly predicted four of the five LR regulators with high  
518 confidence and known nodulation TFs including the expected relationships between them. For  
519 example, the phylogenetic analysis suggested that ERN2 may not be present in legumes that  
520 form determinate nodules such as soybean, *L. japonicus*, or common bean (50). The expression  
521 of *ERN1* and *ERN2* are under the control of NIN and NF-YA in *Medicago*, a legume that forms  
522 indeterminate nodules. In fact, NF-YA binds the promoter of *ERN1* directly regulating its  
523 expression in *Medicago*. However, *ERN1* expression does not appear to be regulated by NIN or  
524 NF-YA in *L. japonicus* as its expression is not altered in *nin* or *nf-ya* loss of function mutants.  
525 Our GRN prediction also did not identify *ERN1* as a target of NF-YA or NIN in soybean. *ERN1*  
526 is directly regulated by CYCLOPS in *L. japonicus*. NSP2 and CYCLOPS were not included in  
527 the input TF list due to no nodule-specific enrichment and/or incorrect annotation. The inclusion  
528 of CYCLOPS in future analyses might reveal regulatory relationships between ERN1 and  
529 CYCLOPS in soybean. It remains to be seen if this is conserved among other determinate nodule  
530 forming legumes including soybean. Given the reliability of the pipeline in accurately predicting  
531 known TFs, we discuss previously unknown regulators of nodule development predicted by the  
532 pipeline.

533

534 An identified EN-GRN was enriched with cell division and cycle functions. Three TFs  
535 were predicted to drive GRNs specifically associated with emerging nodules, which are soybean  
536 orthologues of Arabidopsis ANT (AINTEGUMENTA; At4g37750), AP2/B3 domain  
537 transcriptional factor (At5g58280), and AtGRF5 (Growth-Regulating Factor 5). All the three  
538 genes are associated with sites of cell proliferation in Arabidopsis. While GRF5 plays a role in  
539 cell proliferation during leaf primordia formation and leaf development, ANT is crucial for  
540 flower development. At5g58280 shows the highest expression level in the shoot apex,  
541 particularly in the central zone. Indeed, it is likely that the soybean TFs associated with EN  
542 GRNs direct cell proliferation during early nodule development. Seven other TFs belonging to  
543 C3H, bZIP, MYB1, NF-YC, and SHR were also predicted to co-regulate GRN modules in both  
544 emerging nodules and emerging lateral roots (Table 1). Soybean ANT ortholog was the regulator  
545 with the highest score in our analysis (0.8) and was predicted to co-regulate ten target genes  
546 specifically in emerging nodules. Its targets included *ATCSLA09*, *ALDH2C4*, *GCL1* (*GCR2*-  
547 *LIKE 1*), *AAP6*, and auxin-responsive protein. A maximum of 51 co-regulated target genes were  
548 predicted for a C3H TF regulator (enriched in both EN and ELR) by all three modes. Most of the  
549 target genes such as glycosyl hydrolase family protein, *CYCA1;1* (Cyclin A1;1), zinc finger  
550 (C3HC4-type RING finger), *CDKB1*, *CMT3* (chromomethylase 3); DNA (cytosine-5-)-  
551 methyltransferase, calmodulin-binding protein-related, *CYC1BAT*; cyclin-dependent protein  
552 kinase regulator, mitotic spindle checkpoint protein, putative (*MAD2*), *ATARP7* (Actin-Related  
553 Protein 7); structural constituent of cytoskeleton, kinesin motor protein-related, and *CDC20.1*;  
554 signal transducer, were high scoring target genes.

555  
556 GO enrichment analysis of genes involved in EN and EN-ELR GRNs showed significant  
557 enrichment of regulation of a cell cycle, movement of a cell or subcellular component,  
558 microtubule-based movement, cell division, and cell cycle biological process. (Supplementary  
559 Table S10). This is consistent with biological processes known to occur early during lateral  
560 organ development. *Cis-regulatory* motif GACCGTTA was enriched in the EN related GRN  
561 regulated by a Myb/SANT TF (Supplementary Table S10).

562  
563 Similarly, MN-GRN involved in mature nodule development was enriched with meristem  
564 initiation and growth. Nine TF regulators belonging to GRAS (scarecrow-like transcription

565 factor 6, SCL6), LBD41 (LOB Domain-Containing Protein 41), AP2 domain-containing  
566 transcription factor TINY, NUC (nutcracker); nucleic acid binding, bZIP5 (Arabidopsis thaliana  
567 basic leucine-zipper 5), FRU (FER-Like Regulator Of Iron Uptake), RR18 (Arabidopsis  
568 Response Regulator 18), a Myb/SANT-like DNA binding protein, and a SCREAM-like protein  
569 appear to co-regulate GRN modules late during nodule (MN) development. Among these TFs,  
570 LBD41 had the highest score (0.77). LBD41 was predicted to co-regulate 38 target genes, among  
571 which *PDC2* (pyruvate decarboxylase-2) had the highest normalized score (0.7). Other targets  
572 included *PSAT*, *SRO2* (similar to rcd one 2), MEE14 (maternal effect embryo arrest 14), zinc  
573 finger (AN1-like), SNF2, trehalose-6-phosphate phosphatase, hypoxia-responsive family protein,  
574 bHLH, wound-responsive family protein, and ASP1 (Aspartate Aminotransferase 1) with  
575 normalized score > 0.5 (Figure 7). Arabidopsis LBD41 is associated with hypoxia response and  
576 multiple targets predicted for the soybean ortholog of LBD41 in MN were also associated with  
577 hypoxia (51). Nodule oxygen concentrations are highly regulated to enable the proper  
578 functioning of the oxygen-sensitive nitrogenase enzyme complex. It is tempting to suggest that  
579 soybean LBD41 might play a role in regulating response to hypoxia in MN. The Arabidopsis  
580 orthologs of SCL-6 a key regulator in MN, play a role in shoot branching by regulating axillary  
581 bud development (52). We had previously suggested that nodules and shoot axillary meristems  
582 require a similar hormone balance during development. It is possible that some developmental  
583 pathways such as those regulated by SCL6 are shared between these organs. Similarly, the role  
584 of Arabidopsis NUTCRACKER protein required in periclinal cell divisions (53), that of FRU in  
585 uptake of iron (54), and RR18 in positive regulating cytokinin activity (55) are all consistent with  
586 biological processes observed in MN tissues (56, 57). GO enrichment analysis for MN-GRN  
587 genes showed enrichment of specification of axis polarity, adaxial/abaxial axis specification,  
588 meristem initiation, meristem growth and regulation of meristem growth (Supplementary Table  
589 S10). While these processes are known to occur in mature nodules, TFs associated with these  
590 processes had not been identified previously. Genes involved in MN-GRN had significant  
591 enrichment (P-value  $\leq$  0.05 FDR) for *cis*-regulatory motifs GGGCCCAC, ACCG and TGTCGG  
592 in their upstream regulatory regions. These are likely to be regulated by TCP, AP2 and B3 TFs  
593 respectively (Supplementary Table S10). The study has revealed potential TFs associated with  
594 different functions in nodule development.

595

## 596 **Data availability**

597 Gene expression data used to construct gene regulatory networks are available in NCBI Gene  
598 Expression Omnibus (GEO), accession number GSE129509. Raw data files are available in  
599 NCBI's Sequence Read Archive (SRA) and can be accessed via links available at the GEO  
600 record URL: <https://www.ncbi.nlm.nih.gov/geo/query/acc.cgi?acc=GSE129509>.

601

## 602 **Funding**

603 This work was supported by grant awards from the National Science Foundation/EPSCoR  
604 Cooperative Agreements #IIA-1355423 and 1849206; National Science Foundation's Plant  
605 Genome Research Program (IOS-1350189 to SS); United States Department of Agriculture  
606 National Institute of Food and Agriculture (2016-67014-24589 to SS); and SD Agricultural  
607 Experiment Station (SD00H543-15). Jason Kiehne was a NSF-REU fellow supported by award#  
608 OAC-1559978.

609

## 610 **Acknowledgements**

611 Use of South Dakota State University's high-performance computing clusters for data analysis  
612 and technical support from South Dakota State University's research information technology  
613 team (Dr. Brian Moore) are gratefully acknowledged.

614

## 615 **Conflict of interest**

616 The authors declare no conflict of interest.

617

## 618 **References**

- 619 1. Eeckhoutte,J., Métivier,R. and Salbert,G. (2009) Defining specificity of transcription factor regulatory  
620 activities. *J. Cell Sci.*, **122**, 4027–4034.
- 621 2. Blais,A. and Dynlacht,B.D. (2005) Constructing transcriptional regulatory networks. *Genes Dev.*, **19**,  
622 1499–1511.
- 623 3. Baitaluk,M., Kozhenkov,S. and Ponomarenko,J. (2012) An Integrative Approach to Inferring Gene  
624 Regulatory Module Networks. *PLoS ONE*, **7**.
- 625 4. Udvardi,M.K., Kakar,K., Wandrey,M., Montanari,O., Murray,J.D., Andriankaja,A., Zhang,J.,  
626 Benedito,V.A., Hofer,J.M.I. and Chueng,F. (2007) Update on Legume Transcription Factors  
627 Legume Transcription Factors: Global Regulators of Plant Development and Response to the  
628 Environment 1 [ W ]. In.

- 629 5. Kaufmann,K., Pajoro,A. and Angenent,G.C. (2010) Regulation of transcription in plants: mechanisms  
630 controlling developmental switches. *Nat. Rev. Genet.*, **11**, 830–842.
- 631 6. Guan,D., Shao,J., Zhao,Z., Wang,P., Qin,J., Deng,Y., Boheler,K.R., Wang,J. and Yan,B. (2014) PTHGRN:  
632 unraveling post-translational hierarchical gene regulatory networks using PPI, ChIP-seq and gene  
633 expression data. *Nucleic Acids Res.*, **42**, W130–W136.
- 634 7. Rivas,J.D.L. and Fontanillo,C. (2010) Protein–Protein Interactions Essentials: Key Concepts to Building  
635 and Analyzing Interactome Networks. *PLOS Comput. Biol.*, **6**, e1000807.
- 636 8. Szklarczyk,D., Morris,J.H., Cook,H., Kuhn,M., Wyder,S., Simonovic,M., Santos,A., Doncheva,N.T.,  
637 Roth,A., Bork,P., *et al.* (2017) The STRING database in 2017: quality-controlled protein–protein  
638 association networks, made broadly accessible. *Nucleic Acids Res.*, **45**, D362–D368.
- 639 9. Chaturvedi,I., Sakharkar,M.K. and Rajapakse,J.C. (2007) Validation of Gene Regulatory Networks from  
640 Protein-Protein Interaction Data: Application to Cell-Cycle Regulation. In *Pattern Recognition in*  
641 *Bioinformatics*. Springer, Berlin, Heidelberg, pp. 300–310.
- 642 10. Sun,N. and Zhao,H. (2009) Reconstructing transcriptional regulatory networks through genomics  
643 data. *Stat. Methods Med. Res.*, **18**, 595–617.
- 644 11. Li,Y. and Jackson,S.A. (2016) Crowdsourcing the nodulation gene network discovery environment.  
645 *BMC Bioinformatics*, **17**.
- 646 12. Zhu,M., Dahmen,J.L., Stacey,G. and Cheng,J. (2013) Predicting gene regulatory networks of soybean  
647 nodulation from RNA-Seq transcriptome data. *BMC Bioinformatics*, **14**, 278.
- 648 13. Adhikari,S., Damodaran,S. and Subramanian,S. (2019) Lateral Root and Nodule Transcriptomes of  
649 Soybean. *Data*, **4**, 64.
- 650 14. Xie,J., Ma,A., Zhang,Y., Liu,B., Cao,S., Wang,C., Xu,J., Zhang,C. and Ma,Q. QUBIC2: a novel and robust  
651 biclustering algorithm for analyses and interpretation of large-scale RNA-Seq data.  
652 *Bioinformatics*, 10.1093/bioinformatics/btz692.
- 653 15. Li,G., Ma,Q., Tang,H., Paterson,A.H. and Xu,Y. (2009) QUBIC: a qualitative biclustering algorithm for  
654 analyses of gene expression data. *Nucleic Acids Res.*, **37**, e101.
- 655 16. Zhang,Y., Xie,J., Yang,J., Fennell,A., Zhang,C. and Ma,Q. (2017) QUBIC: a bioconductor package for  
656 qualitative biclustering analysis of gene co-expression data. *Bioinformatics*, **33**, 450–452.
- 657 17. Bonnet,E., Calzone,L. and Michoel,T. (2015) Integrative Multi-omics Module Network Inference with  
658 Lemon-Tree. *PLOS Comput. Biol.*, **11**, e1003983.
- 659 18. Greenfield,A., Madar,A., Ostrer,H. and Bonneau,R. (2010) DREAM4: Combining genetic and dynamic  
660 information to identify biological networks and dynamical models. *PLoS One*, **5**, e13397.
- 661 19. Severin,A.J., Woody,J.L., Bolon,Y.-T., Joseph,B., Diers,B.W., Farmer,A.D., Muehlbauer,G.J.,  
662 Nelson,R.T., Grant,D., Specht,J.E., *et al.* (2010) RNA-Seq Atlas of Glycine max: A guide to the  
663 soybean transcriptome. *BMC Plant Biol.*, **10**, 160.

- 664 20. Libault,M., Farmer,A., Brechenmacher,L., Drnevich,J., Langley,R.J., Bilgin,D.D., Radwan,O.,  
665 Neece,D.J., Clough,S.J., May,G.D., *et al.* (2010) Complete Transcriptome of the Soybean Root  
666 Hair Cell, a Single-Cell Model, and Its Alteration in Response to Bradyrhizobium japonicum  
667 Infection. *Plant Physiol.*, **152**, 541–552.
- 668 21. Libault,M., Farmer,A., Joshi,T., Takahashi,K., Langley,R.J., Franklin,L.D., He,J., Xu,D., May,G. and  
669 Stacey,G. (2010) An integrated transcriptome atlas of the crop model Glycine max, and its use in  
670 comparative analyses in plants. *Plant J. Cell Mol. Biol.*, **63**, 86–99.
- 671 22. Jin,J., Zhang,H., Kong,L., Gao,G. and Luo,J. (2014) PlantTFDB 3.0: a portal for the functional and  
672 evolutionary study of plant transcription factors. *Nucleic Acids Res.*, **42**, D1182–D1187.
- 673 23. Bonneau,R., Reiss,D.J., Shannon,P., Facciotti,M., Hood,L., Baliga,N.S. and Thorsson,V. (2006) The  
674 Inferelator: an algorithm for learning parsimonious regulatory networks from systems-biology  
675 data sets de novo. *Genome Biol.*, **7**, R36.
- 676 24. Joshi,A., De Smet,R., Marchal,K., Van de Peer,Y. and Michoel,T. (2009) Module networks revisited:  
677 computational assessment and prioritization of model predictions. *Bioinformatics*, **25**, 490–496.
- 678 25. Ciofani,M., Madar,A., Galan,C., Sellars,M., Mace,K., Pauli,F., Agarwal,A., Huang,W., Parkurst,C.N.,  
679 Muratet,M., *et al.* (2012) A Validated Regulatory Network for Th17 Cell Specification. *Cell*, **151**,  
680 289–303.
- 681 26. Shannon,P., Markiel,A., Ozier,O., Baliga,N.S., Wang,J.T., Ramage,D., Amin,N., Schwikowski,B. and  
682 Ideker,T. (2003) Cytoscape: a software environment for integrated models of biomolecular  
683 interaction networks. *Genome Res.*, **13**, 2498–2504.
- 684 27. Szklarczyk,D., Franceschini,A., Wyder,S., Forslund,K., Heller,D., Huerta-Cepas,J., Simonovic,M.,  
685 Roth,A., Santos,A., Tsafou,K.P., *et al.* (2015) STRING v10: protein-protein interaction networks,  
686 integrated over the tree of life. *Nucleic Acids Res.*, **43**, D447–452.
- 687 28. Collier,R. and Tegeder,M. (2012) Soybean ureide transporters play a critical role in nodule  
688 development, function and nitrogen export. *Plant J.*, **72**, 355–367.
- 689 29. Lewis,D.R., Olex,A.L., Lundy,S.R., Turkett,W.H., Fetrow,J.S. and Muday,G.K. (2013) A Kinetic Analysis  
690 of the Auxin Transcriptome Reveals Cell Wall Remodeling Proteins That Modulate Lateral Root  
691 Development in Arabidopsis. *Plant Cell*, **25**, 3329–3346.
- 692 30. Magne,K., Couzigou,J.-M., Schiessl,K., Liu,S., George,J., Zhukov,V., Sahl,L., Boyer,F., Iantcheva,A.,  
693 Mysore,K.S., *et al.* (2018) MtNODULE ROOT1 and MtNODULE ROOT2 Are Essential for  
694 Indeterminate Nodule Identity. *Plant Physiol.*, **178**, 295–316.
- 695 31. Schauser,L., Roussis,A., Stiller,J. and Stougaard,J. (1999) A plant regulator controlling development of  
696 symbiotic root nodules. *Nature*, **402**, 191.
- 697 32. Battaglia,M., Ripodas,C., Clúa,J., Baudin,M., Aguilar,O.M., Niebel,A., Zanetti,M.E. and Blanco,F.A.  
698 (2014) A Nuclear Factor Y Interacting Protein of the GRAS Family Is Required for Nodule  
699 Organogenesis, Infection Thread Progression, and Lateral Root Growth1[C][W][OPEN]. *Plant*  
700 *Physiol.*, **164**, 1430–1442.

- 701 33. Baudin,M., Laloum,T., Lepage,A., Ripodas,C., Ariel,F., Frances,L., Crespi,M., Gamas,P., Blanco,F.A.,  
702 Zañetti,M.E., *et al.* (2015) A Phylogenetically Conserved Group of Nuclear Factor-Y Transcription  
703 Factors Interact to Control Nodulation in Legumes1[OPEN]. *Plant Physiol.*, **169**, 2761–2773.
- 704 34. Hayashi,S., Reid,D.E., Lorenc,M.T., Stiller,J., Edwards,D., Gresshoff,P.M. and Ferguson,B.J. (2012)  
705 Transient Nod factor-dependent gene expression in the nodulation-competent zone of soybean  
706 (*Glycine max* [L.] Merr.) roots. *Plant Biotechnol. J.*, **10**, 995–1010.
- 707 35. Heckmann,A.B., Lombardo,F., Miwa,H., Perry,J.A., Bunnewell,S., Parniske,M., Wang,T.L. and  
708 Downie,J.A. (2006) Lotus japonicus nodulation requires two GRAS domain regulators, one of  
709 which is functionally conserved in a non-legume. *Plant Physiol.*, **142**, 1739–1750.
- 710 36. Heckmann,A.B., Sandal,N., Bek,A.S., Madsen,L.H., Jurkiewicz,A., Nielsen,M.W., Tirichine,L. and  
711 Stougaard,J. (2011) Cytokinin Induction of Root Nodule Primordia in Lotus japonicus Is  
712 Regulated by a Mechanism Operating in the Root Cortex. *Mol. Plant. Microbe Interact.*, **24**,  
713 1385–1395.
- 714 37. Singh,S., Katzer,K., Lambert,J., Cerri,M. and Parniske,M. (2014) CYCLOPS, A DNA-Binding  
715 Transcriptional Activator, Orchestrates Symbiotic Root Nodule Development. *Cell Host Microbe*,  
716 **15**, 139–152.
- 717 38. Zhu,H., Chen,T., Zhu,M., Fang,Q., Kang,H., Hong,Z. and Zhang,Z. (2008) A Novel ARID DNA-Binding  
718 Protein Interacts with SymRK and Is Expressed during Early Nodule Development in Lotus  
719 japonicus. *Plant Physiol.*, **148**, 337–347.
- 720 39. Soyano,T., Kouchi,H., Hirota,A. and Hayashi,M. (2013) NODULE INCEPTION Directly Targets NF-Y  
721 Subunit Genes to Regulate Essential Processes of Root Nodule Development in Lotus japonicus.  
722 *PLOS Genet.*, **9**, e1003352.
- 723 40. Xulvi-Brunet,R. and Li,H. (2010) Co-expression networks: graph properties and topological  
724 comparisons. *Bioinformatics*, **26**, 205–214.
- 725 41. Barabasi,A.-L. and Oltvai,Z.N. (2004) Network biology: understanding the cell's functional  
726 organization. *Nat. Rev. Genet.*, **5**, 101–113.
- 727 42. Isik,Z., Baldow,C., Cannistraci,C.V. and Schroeder,M. (2015) Drug target prioritization by perturbed  
728 gene expression and network information. *Sci. Rep.*, **5**.
- 729 43. De Rybel,B., Vassileva,V., Parizot,B., Demeulenaere,M., Grunewald,W., Audenaert,D., Van  
730 Campenhout,J., Overvoorde,P., Jansen,L., Vanneste,S., *et al.* (2010) A Novel Aux/IAA28 Signaling  
731 Cascade Activates GATA23-Dependent Specification of Lateral Root Founder Cell Identity. *Curr.*  
732 *Biol.*, **20**, 1697–1706.
- 733 44. Rogg,L.E., Lasswell,J. and Bartel,B. (2001) A gain-of-function mutation in IAA28 suppresses lateral  
734 root development. *Plant Cell*, **13**, 465–480.
- 735 45. Dolinski,K. and Troyanskaya,O.G. (2015) Implications of Big Data for cell biology. *Mol. Biol. Cell*, **26**,  
736 2575–2578.



- 737 46. Finkle, J.D., Wu, J.J. and Bagheri, N. (2018) Windowed Granger causal inference strategy improves  
738 discovery of gene regulatory networks. *Proc. Natl. Acad. Sci. U. S. A.*, **115**, 2252–2257.
- 739 47. Michoel, T., De Smet, R., Joshi, A., Van de Peer, Y. and Marchal, K. (2009) Comparative analysis of  
740 module-based versus direct methods for reverse-engineering transcriptional regulatory  
741 networks. *BMC Syst. Biol.*, **3**, 49.
- 742 48. Vermeirssen, V., Joshi, A., Michoel, T., Bonnet, E., Casneuf, T. and Van de Peer, Y. (2009) Transcription  
743 regulatory networks in *Caenorhabditis elegans* inferred through reverse-engineering of gene  
744 expression profiles constitute biological hypotheses for metazoan development. *Mol. Biosyst.*, **5**,  
745 1817–1830.
- 746 49. De Smet, R. and Marchal, K. (2010) Advantages and limitations of current network inference methods.  
747 *Nat. Rev. Microbiol.*, **8**, 717–729.
- 748 50. Kawaharada, Y., James, E.K., Kelly, S., Sandal, N. and Stougaard, J. (2017) The Ethylene Responsive  
749 Factor Required for Nodulation 1 (ERN1) Transcription Factor Is Required for Infection-Thread  
750 Formation in *Lotus japonicus*. *Mol. Plant. Microbe Interact.*, **30**, 194–204.
- 751 51. Gasch, P., Fündinger, M., Müller, J.T., Lee, T., Bailey-Serres, J. and Mustroph, A. (2016) Redundant ERF-  
752 VII Transcription Factors Bind to an Evolutionarily Conserved cis-Motif to Regulate Hypoxia-  
753 Responsive Gene Expression in *Arabidopsis*. *Plant Cell*, **28**, 160–180.
- 754 52. Wang, L., Mai, Y.-X., Zhang, Y.-C., Luo, Q. and Yang, H.-Q. (2010) MicroRNA171c-Targeted SCL6-II, SCL6-  
755 III, and SCL6-IV Genes Regulate Shoot Branching in *Arabidopsis*. *Mol. Plant*, **3**, 794–806.
- 756 53. Long, Y., Smet, W., Cruz-Ramírez, A., Castelijns, B., de Jonge, W., Mähönen, A.P., Bouchet, B.P.,  
757 Perez, G.S., Akhmanova, A., Scheres, B., *et al.* (2015) *Arabidopsis* BIRD Zinc Finger Proteins Jointly  
758 Stabilize Tissue Boundaries by Confining the Cell Fate Regulator SHORT-ROOT and Contributing  
759 to Fate Specification. *Plant Cell*, **27**, 1185–1199.
- 760 54. Jakoby, M., Wang, H.-Y., Reidt, W., Weisshaar, B. and Bauer, P. (2004) FRU (BHLH029) is required for  
761 induction of iron mobilization genes in *Arabidopsis thaliana*. *FEBS Lett.*, **577**, 528–534.
- 762 55. Veerabagu, M., Elgass, K., Kirchler, T., Huppenberger, P., Harter, K., Chaban, C. and Mira-Rodado, V.  
763 (2012) The *Arabidopsis* B-type response regulator 18 homomerizes and positively regulates  
764 cytokinin responses. *Plant J.*, **72**, 721–731.
- 765 56. Breakspear, A., Liu, C., Roy, S., Stacey, N., Rogers, C., Trick, M., Morieri, G., Mysore, K.S., Wen, J.,  
766 Oldroyd, G.E.D., *et al.* (2014) The root hair ‘infectome’ of *Medicago truncatula* uncovers changes  
767 in cell cycle genes and reveals a requirement for Auxin signaling in rhizobial infection. *Plant Cell*,  
768 **26**, 4680–4701.
- 769 57. Reid, D., Nadzieja, M., Novák, O., Heckmann, A.B., Sandal, N. and Stougaard, J. (2017) Cytokinin  
770 Biosynthesis Promotes Cortical Cell Responses during Nodule Development. *Plant Physiol.*, **175**,  
771 361–375.

772  
773

774 **Figures legends**

775 **Figures**

776

777 **Figure 1.** Schematic representation showing our workflows for prediction of regulator  
778 transcription factors (TFs) and their Gene Regulatory Networks (GRNs) for root lateral organ  
779 development in soybean.

780

781 **Figure 2.** Transcription factor (TF) families enriched in specific root lateral organs. Bar graphs  
782 indicated the number of family members enriched in nodules (blue) or lateral roots (orange). TF  
783 annotations are based on Plant Transcription Factor Databases (PlantTFDB). Asterisks indicate  
784 TF families that were significantly enriched either in nodule or lateral root (Fisher's exact test;  $P$   
785  $< 0.05$ ).

786

787 **Figure 3.** Optimization of QUBIC parameter. Relationship between QUBIC's consistency  
788 parameter " $c$ " (tested from 1 to 0.6) and the number of target transcription factors (TFs) included  
789 in bicluster (BC) versus the size of the BC (total number of genes). Each block denotes  $-c$  value,  
790 TF included in BCs, and total number of genes at that " $c$ " value. The optimal " $c$ " value selected  
791 for final analysis is highlighted.

792

793 **Figure 4.** Distribution of Lemon-Tree scores of true and random regulators for root lateral organ  
794 development in soybean. Histogram shows the distribution of score for true and randomly  
795 assigned regulator from Lemon-Tree mode I (orange) and mode II (green) produced network.  
796 Arrows indicate the minimum and maximum scores from each category with values in  
797 parenthesis.

798

799 **Figure 5.** Overlap and differences among outputs from the three different network approaches.  
800 (A) Transcription factors (TF) predicted as regulators from three different network approaches.  
801 (B) Regulatory interactions predicted by three different network approaches. Numbers in center  
802 indicate the number of potential regulators (in A) and interactions (in B) recovered by all the  
803 three different approaches playing role in root lateral organ development in soybean.

804

805 **Figure 6.** Figure showing consensus 182 co-regulatory interactions predicted and recovered by  
806 three different modes chosen in this study. Nodes in diamond denote regulator transcription  
807 factors (TFs) and circles denote predicted target genes. Edges denote the normalized score of  
808 interaction calculated by all three different modes. Broader the edges, higher the interaction  
809 score.

810

811 **Figure 7.** Heat map showing normalized expression from varied samples of root lateral organ  
812 development in soybean for regulator transcription factors (TFs) and their co-regulatory target  
813 genes in consensus network predicted by three different modes chosen in our study. Row  
814 annotation for 21 regulator TFs and their co-regulatory partners are shown in different colors.

815

816

817 **Table1.** List of transcription factors predicted as regulator by all three workflows used in our  
818 study.

| 21 TFs IDs    | TF annotation                            | Enrichment (log <sub>2</sub> fold change) in each organ |       |       |       |
|---------------|------------------------------------------|---------------------------------------------------------|-------|-------|-------|
|               |                                          | EN                                                      | MN    | ELR   | YLR   |
| Glyma03g27050 | AP2 domain-containing protein (TINY)     |                                                         | 2.32  |       |       |
| Glyma17g08380 | ARR18 (RESPONSE REGULATOR 18)            |                                                         | 2.96  |       |       |
| Glyma11g04920 | AtbZIP5 (basic leucine-zipper 5)         |                                                         |       |       |       |
| Glyma13g39650 | FRU (FER-LIKE REGULATOR OF IRON UPTAKE)  |                                                         | 1.8   | -1.74 | -3.04 |
| Glyma03g03760 | GRAS TF; scarecrow-like 6 (SCL6)         |                                                         | 2.29  | 1.22  |       |
| Glyma19g06280 | LBD41 (LOB DOMAIN-CONTAINING PROTEIN 41) |                                                         | 1.19  |       |       |
| Glyma06g44080 | NUC (nutcracker)                         |                                                         | 1.53  |       |       |
| Glyma03g34730 | Putative transcription factor            |                                                         | 2.49  |       |       |
| Glyma01g32130 | Unknown protein                          |                                                         | 2.45  | -0.87 |       |
| Glyma06g05170 | AP2; ANT (AINTEGUMENTA)                  | 1.42                                                    | -2.23 |       |       |
| Glyma09g07990 | AtGRF5 (GROWTH-REGULATING FACTOR 5)      | 3.34                                                    |       |       |       |
| Glyma02g40400 | Transcriptional factor B3 family protein | 2.76                                                    |       |       |       |
| Glyma14g38460 | AtbZIP52 (basic leucine zipper 52)       | 1.51                                                    |       | 1.25  |       |
| Glyma16g01296 | C3H                                      | 2.01                                                    |       | 2.17  |       |
| Glyma05g22460 | SHR (SHORT ROOT)                         | 1.78                                                    |       | 1.55  |       |
| Glyma06g08660 | PC-MYB1                                  | 1.4                                                     |       | 1.42  |       |
| Glyma11g37130 | NFYC                                     | 3.57                                                    |       | 1.49  |       |
| Glyma11g20490 | ARF10 (AUXIN RESPONSE FACTOR 10)         |                                                         |       | 1.91  | 2.7   |
| Glyma06g20400 | bHLH family protein                      |                                                         |       | 2.35  |       |
| Glyma10g06080 | ARF16 (AUXIN RESPONSE FACTOR 16)         |                                                         |       |       |       |
| Glyma19g36571 | AUX/IAA-ARF complex                      |                                                         |       |       |       |

819

820

821

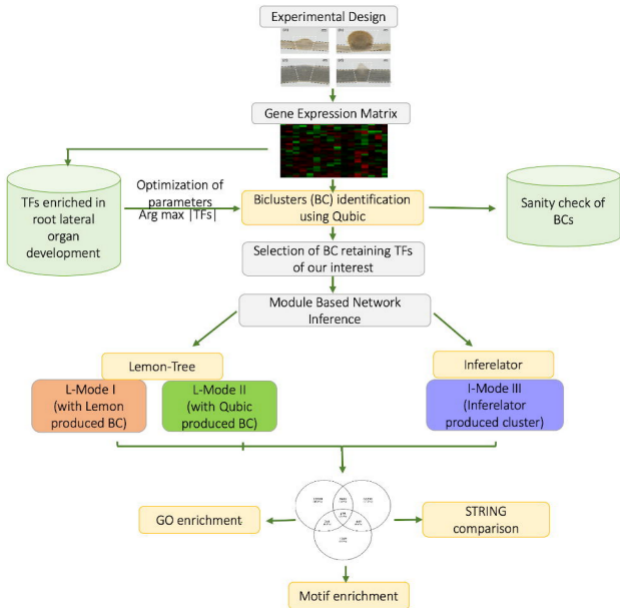

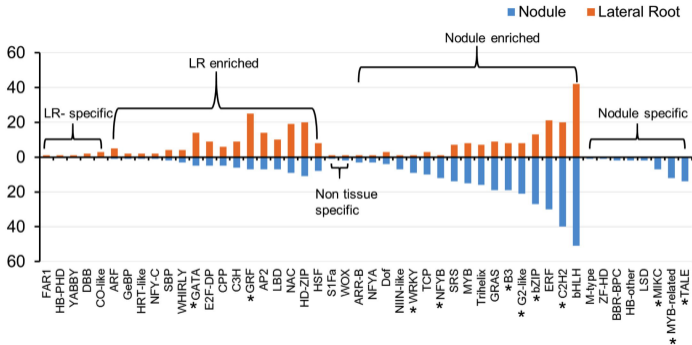

Number of genes in biclusters

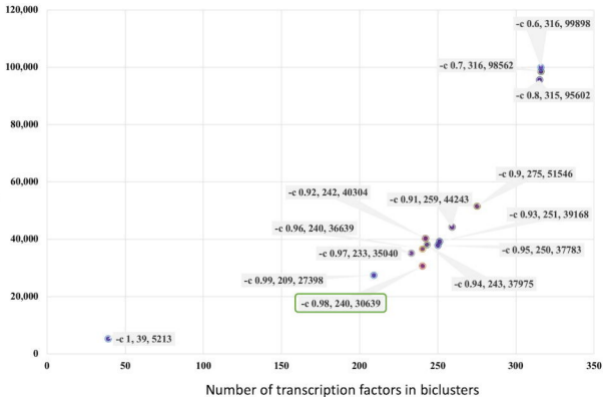

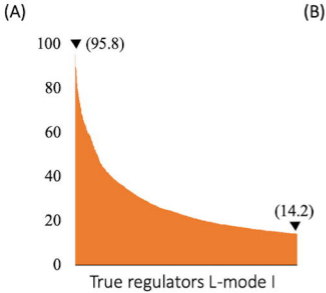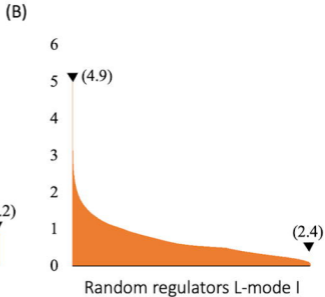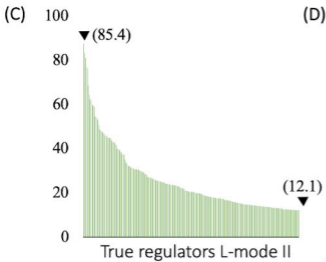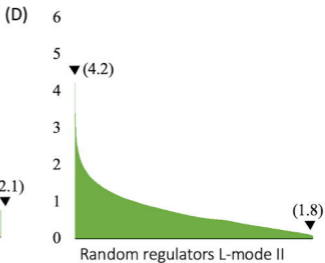



(A) Predicted TF regulators

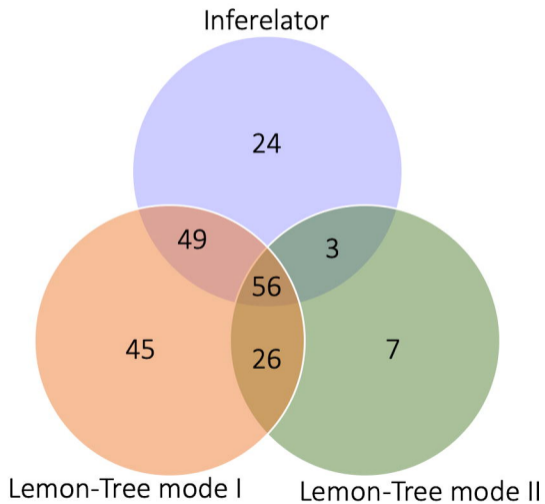

(B) Predicted TF-target gene interaction

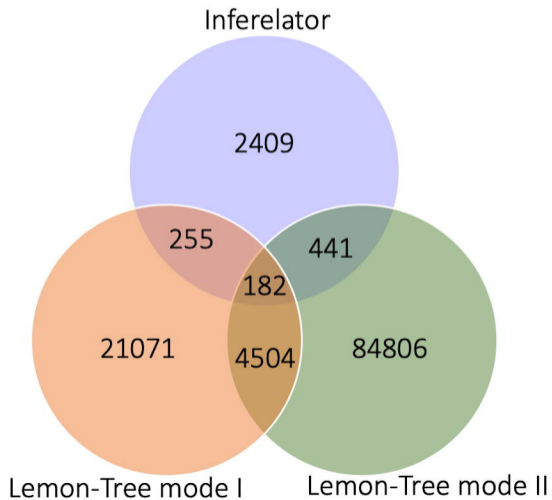

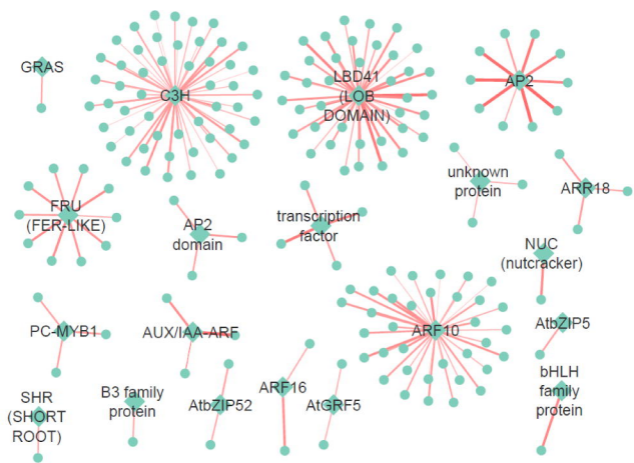

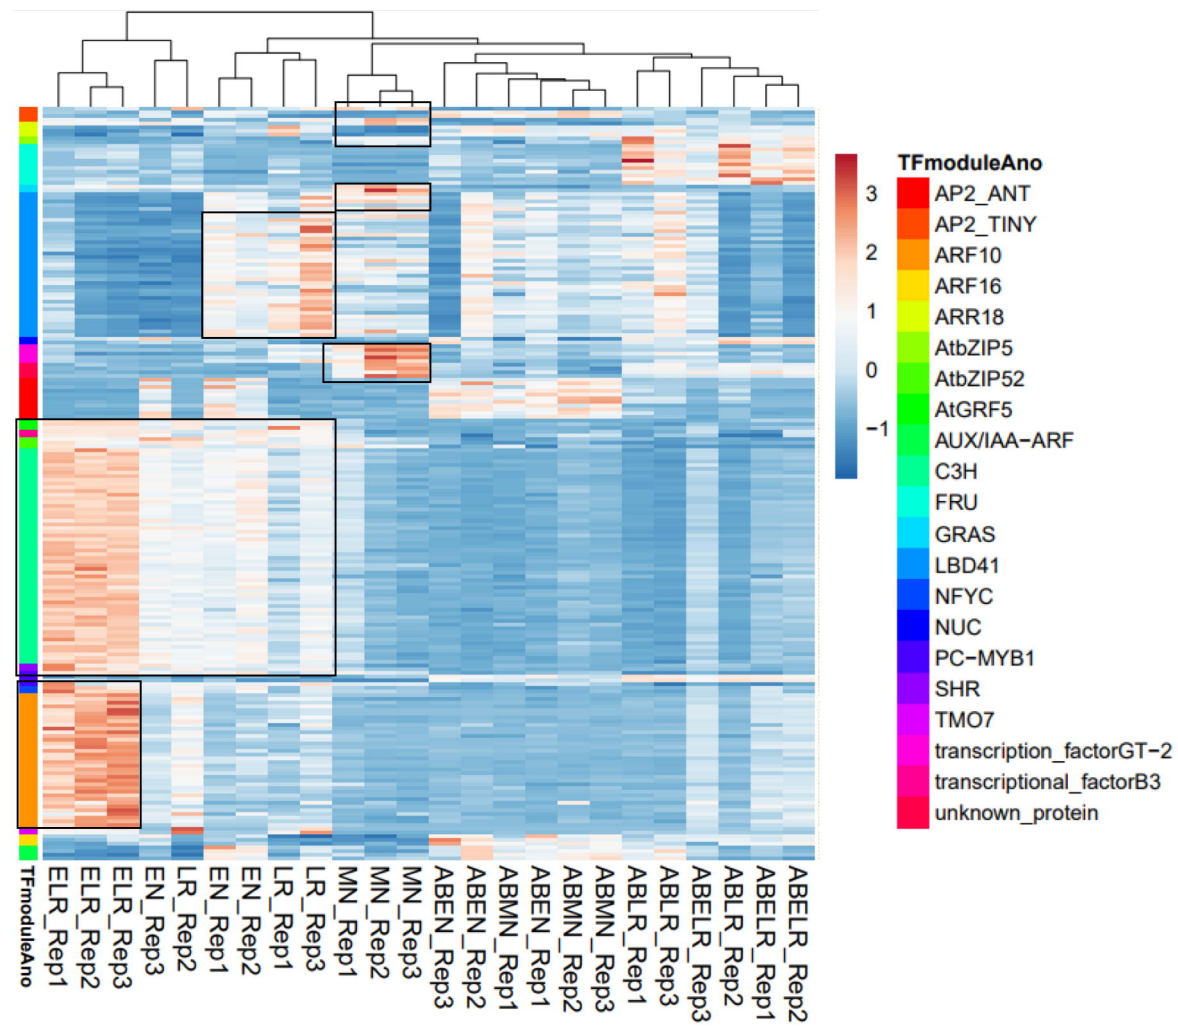

Source: https://www.biorxiv.org/content/10.1101/2019.12.15.876995v1.full.pdf
