# Supplementary material for: Gene regulatory networks associated with lateral root and nodule development in soybean
Source: bioRxiv or medRxiv preprint supplement (doi:10.1101/2019.12.15.876995), 2019-12-16
Supplement: Supplementary file [file media-1.pdf]

**Supplementary Figures**

(A – Regulator TFs)

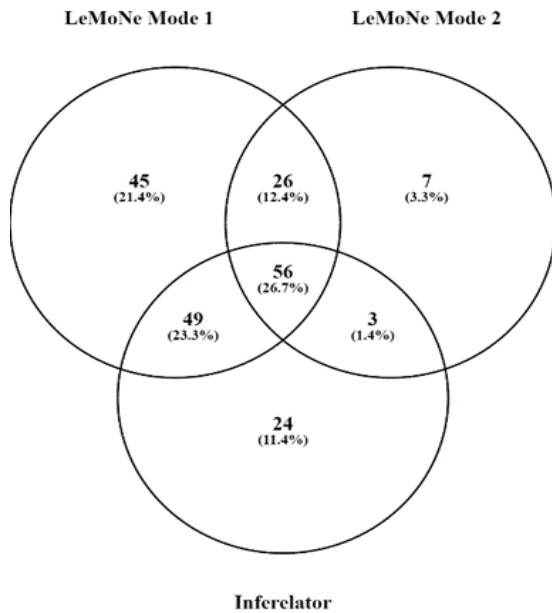

(B – TF-target pairs)

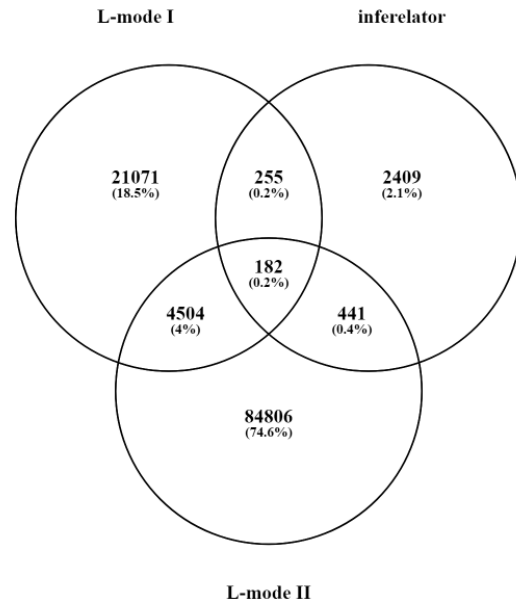

(C – STRING PPIs)

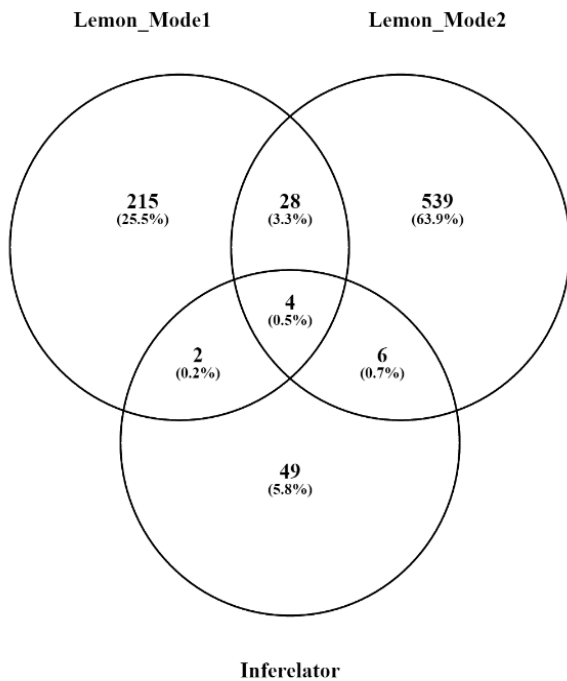

**Supplementary Figure 1**

Venn diagrams outlining overlaps and differences in the outputs among the three different network approaches: (A) Regulator TF prediction; (B) Identification of targets for predicted TFs; (C) Protein-Protein Interactions.

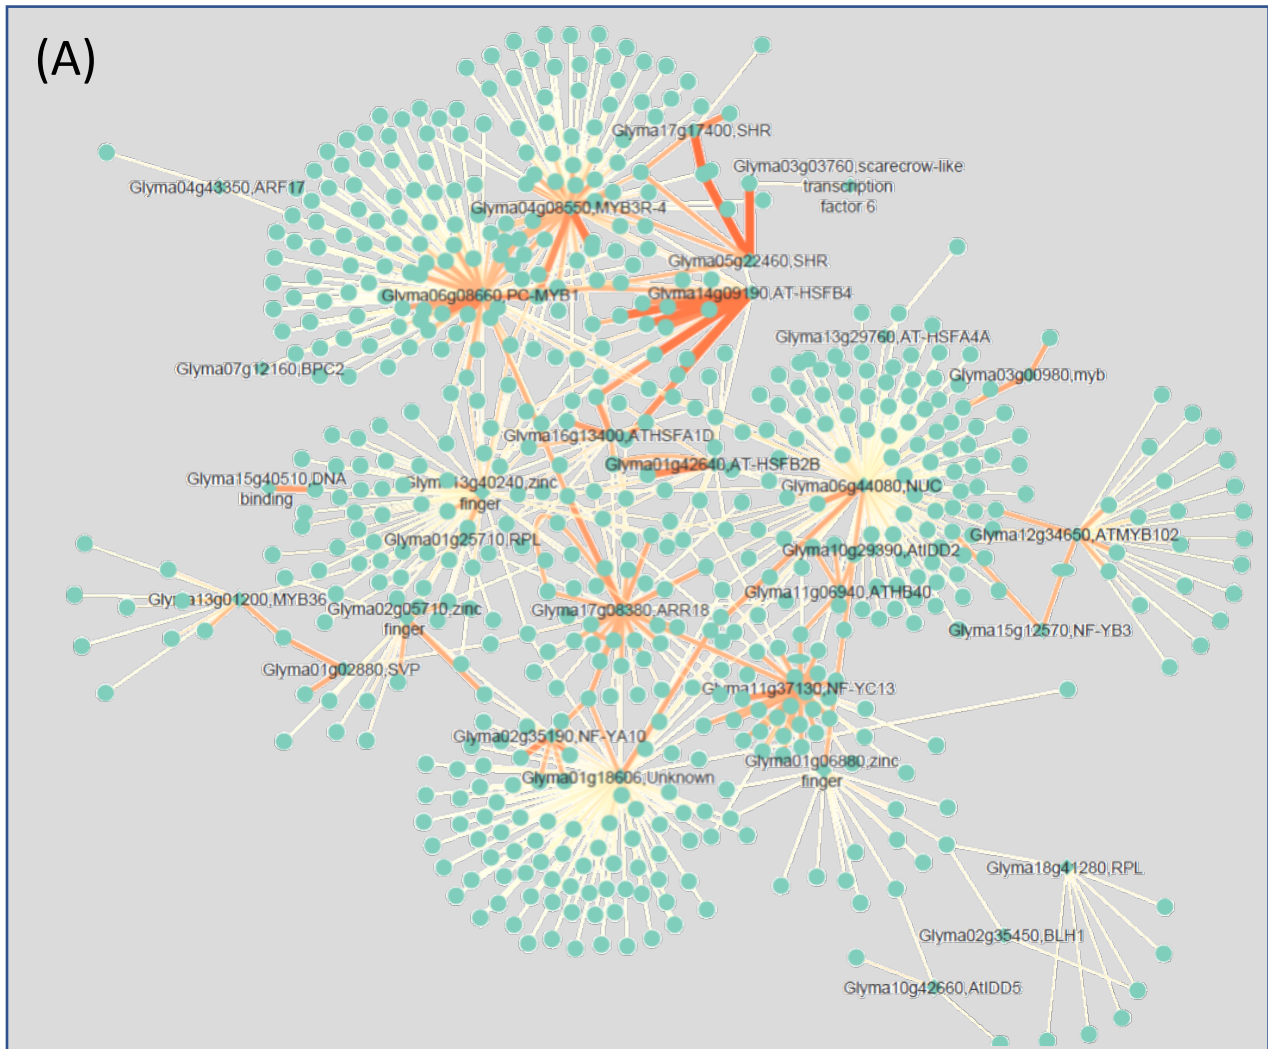

### Supplementary Figure 2A

A total of 843 STRING protein-protein interaction (PPI) predictions matched our co-regulatory expression prediction. The large network is shown here and smaller discrete networks are shown in Supplementary Figure 2B.

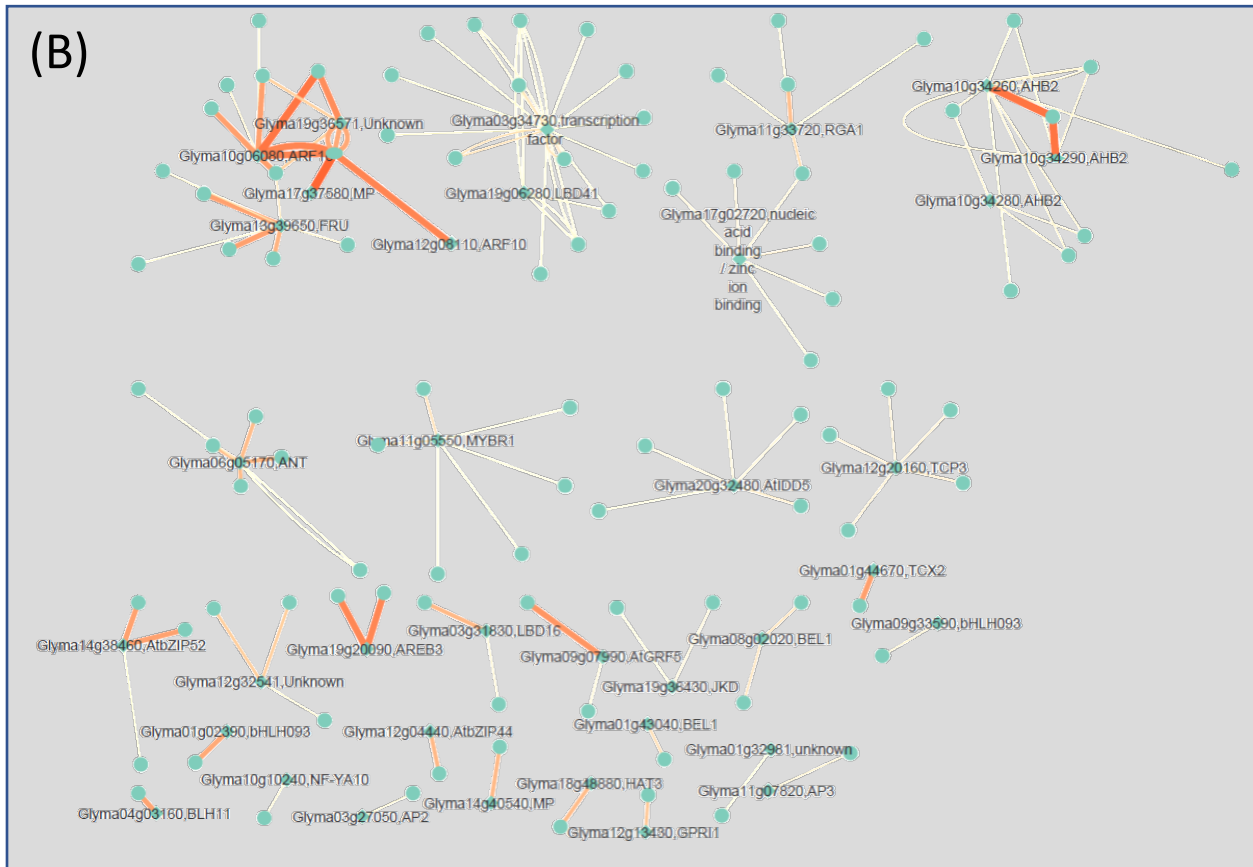

### Supplementary Figure 2B

A total of 843 STRING protein-protein interaction (PPI) predictions matched our co-regulatory expression prediction. Smaller discrete networks are shown here and the large network is shown in Supplementary Figure 2A.

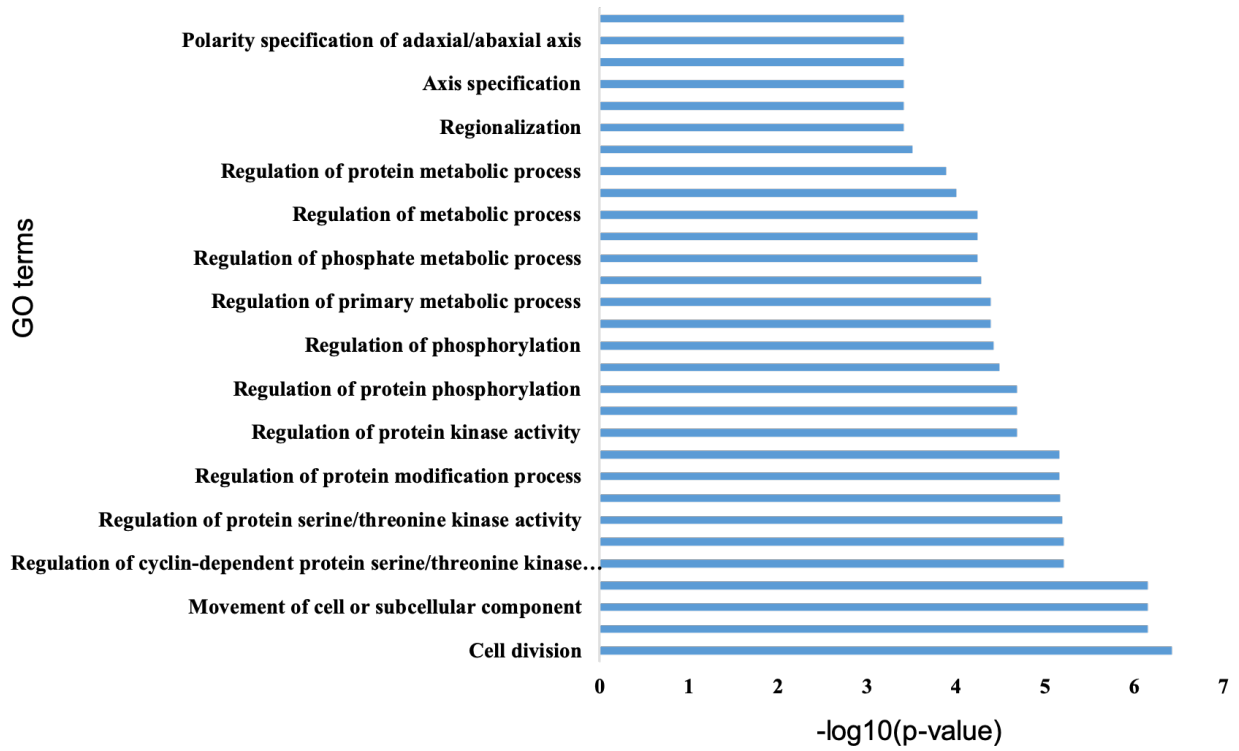

### Supplementary Figure 3

Gene Ontology biological process enrichment of target genes in consensus 182 co-regulatory gene network predicted for root lateral organ development in soybean.
